# Supplementary material for: Intestinal IgA Regulates Expression of a Fructan Polysaccharide Utilization Locus in Colonizing Gut Commensal Bacteroides thetaiotaomicron
Source: PubMed Central journal article supplement (PMC6831775; doi:10.1128/mbio.02324-19), 2019-11-05
Supplement: mBio.02324-19-s0001.pdf [file mBio.02324-19-s0001.pdf]

## 1 **Supplemental Information (SI)**

### 2 **Materials and methods**

3 **Bacterial strains** Most studies were carried out using the type strain *Bacteroides*  
4 *thetaiotaomicron* VPI-5482. *Bacteroides thetaiotaomicron* strain 3731, *Bacteroides*  
5 *thetaiotaomicron* strain 7330, *Bacteroides fingoldii* DSM 17565, *Bacteroides ovatus*  
6 ATCC 8483, *Bacteroides caccae* ATCC 43185, *Bacteroides fragilis* NCTC 9343,  
7 *Bacteroides vulgatus* ATCC 8482, *Parabacteroides merdae* ATCC 43185, *Barnesiella*  
8 *intestinihominis* YIT 11860, *Clostridium cocleatum* ATCC 29901, *Ruminococcus torques*  
9 ATCC 27756, *Salmonella enterica* ATCC 14028, *Enterobacter sakazakii*, *Lactobacillus*  
10 *johnsonii*, *Bifidobacterium longum* and *Akkermasia muciniphila* ATCC BAA-835 were  
11 used as whole cell antigens for ELISA assays. *Bt*  $\Delta$ CPS and electrocompetent *E. coli*  
12 MegaX DH10B™ (Invitrogen) were used for library construction. A human gut *E.coli*  
13 isolate (based on full-length 16S rRNA sequencing) from our lab was used to generate  
14 SI culture supernatant that were used as non-specific IgA control.

15 **Sources and Preparation of Carbohydrates** Glucose, fructose and levan (# 66674)  
16 were all obtained from Sigma.

17 **Colonization of Germ-Free Mice** 6-12 weeks old mice germ-free C57BL/6J wild-type  
18 (WT) or Rag1<sup>-/-</sup> mice were housed in gnotobiotic isolators under a strict 12-hour light  
19 cycle. Mice were colonized with a single gavage of ~10<sup>8</sup> CFU of wild-type *Bt* grown  
20 overnight in TYG (1), and were fed either autoclaved, standard diet (STD) (Labdiet® JL  
21 Rat and Mouse/Auto 6F 5K67), or an irradiated mouse diet lacking fructans (Teklad  
22 Custom Diet: TD.170584). All experiments were performed using protocols approved by  
23 the Johns Hopkins Animal Studies Committee (IACUC).

24 **Generation of Small Intestinal Fragment Lamina Propria Culture Supernatant (SI**  
25 **culture supernatant)** Mice were sacrificed using standard aseptic procedures. Small  
26 intestine was immediately removed and cleaned using ice-cold DMEM supplemented  
27 with 1X Penicillin-Streptomycin and 5% Fetal bovine serum (DMEM-5). Fat tissue was  
28 removed, the gut was opened longitudinally and minced into small (2–5 mm) pieces.  
29 Intestinal pieces were washed with ice-cold DMEM-5 (3x), followed by ice-cold citrate-  
30 buffer solution (50mM tri-sodium citrate, 96mM sodium chloride, 8mM potassium  
31 dihydrogen orthophosphate, 5.6mM disodium hydrogen orthophosphate, 1.5mM  
32 potassium chloride) (2x). The intestine was then incubated for 15 min on a shaker (~300  
33 rpm) in 30 ml citrate-buffer containing 10% fetal calf serum (CB-FCS) (pre-warmed to  
34 37°C), followed by vortexing for ~ 30 seconds to dislodge intestinal epithelial cells. CB-  
35 FCS was removed, and after 3-5 washes with ice-cold DMEM-5, intestinal pieces were  
36 placed in a T10 tissue-culture flask with DMEM-10, and incubated for 36 hours at 37°C,  
37 5% CO<sub>2</sub>. The small intestinal culture supernatant was harvested by centrifugation and  
38 filtration (0.2 µM filter) to get rid of cellular debris, and 0.01% sodium azide was added  
39 for long term storage at 4°C.

40 **ELISA** All ELISAs were performed using standard protocols (2) in 96-well plates. For  
41 isotype ELISA, plates were coated overnight at 4°C with goat anti-mouse Ig (Southern  
42 Biotech; 1:1500 diluted in sodium bicarbonate coating buffer). Plates were washed with  
43 PBS-T (0.05%) (3x) and blocked for 30 min with PBS-BSA (1%) at room temperature.  
44 Serial dilutions of serum samples and SI culture supernatants obtained from germ-free  
45 or *Bt* mono-colonized mice were added to the 96-well plates, followed by incubation with  
46 HRP-conjugated, isotype-specific, secondary antibodies (Southern Biotech; 1:1000

47 dilution in PBS-BSA (1%)). All steps were carried out either at 4°C overnight, or at room  
48 temperature for 2 hours. Plates were developed using ABTS (1 mM; Roche). Reactions  
49 were read at a wavelength of 405 nm. Total antibody was quantified using a reference  
50 curve obtained from serial dilutions of purified anti-mouse immunoglobulins (Southern  
51 Biotech) starting at 1.0 µg/ml.

52 For antigen specific ELISA, bacterial whole cell antigens were used for coating plates.  
53 For high-sensitivity ELISA, the protocol used was similar to the one described above,  
54 expect for modification at the detection step. Briefly, after incubation with HRP-  
55 conjugated anti-mouse IgA, 50 µl/well of biotinylated tyramine solution (diluted 1:500 in  
56 0.1 M sodium borate buffer [pH 8.5], 0.1% H<sub>2</sub>O<sub>2</sub>) was added for signal amplification.  
57 Plates were incubated for 15 min at room temperature followed by three washes with  
58 PBS-T. Neutralite Avidin-HRP (Southern Biotech; 1:2000 dilution) was added to each  
59 well and further incubated for 2 hours at room temperature or overnight at 4°C. Plates  
60 were developed as before.

61 **Preparation of Bacterial Whole Cell Antigens** Overnight grown bacterial cultures  
62 were heat inactivated for 30 min at 60°C, followed by a freeze-thaw cycle and  
63 maintained at -80°C.

64 **Preparation of Fecal supernatants** Fecal pellets maintained at -80°C were first  
65 thawed on ice, and then weighed accurately. A 10% fecal suspension (w/v) was  
66 prepared using 1x PBS (pH 7.2), vortexed vigorously for 20 min, followed by  
67 centrifugation at 14K rpm for 20 minutes. The resultant supernatant contained IgA that  
68 was measured using in high-sensitivity ELISA.

69 **Preparation of Bacterial Whole Cell Lysate** *Bt* grown overnight in TYG medium was  
70 suspended in 10mM Tris-HCl (pH 8.0) containing 1mM EDTA, 0.1% SDS and bacterial  
71 protease inhibitor cocktail (Sigma). Bacterial cells were then lysed by sonication for 3  
72 min using a 10s ON/OFF cycle. Cell debris was removed by centrifugation and protein  
73 content of the supernatants was adjusted to 1 mg/ml using Bradford analysis.

74 **Serum** Orbital blood was collected from gnotobiotic mice before sacrifice.

75 **Western Blot Analysis** Samples were prepared by boiling bacterial whole cell lysate in  
76 2x Laemmli sample buffer (5%  $\beta$ -mercaptoethanol). 0.5  $\mu$ g of the above lysate was  
77 loaded into the wells of 4-20% Mini-PROTEAN TGX™ gel, or 8-16% Criterion TGX™  
78 gel (Bio-Rad) run at a constant voltage of 150V. Proteins were transferred at 100V for  
79 90 min onto a 0.45 $\mu$ m PVDF membrane (GenHunter®). Post blotting, the membrane  
80 was incubated at 4°C overnight with polyclonal IgA from diluted SI culture supernatants  
81 (100ng/ml) in TBS-BSA. Goat anti-mouse IgA-HRP antibody (Southern Biotech; 1:1500  
82 diluted in TBS-BSA) was used as a secondary antibody. The membrane was developed  
83 using Immun-Blot® Opti-4CN™ Colorimetric Kit (Bio-Rad).

84 For the Proteinase K assay, after protein transfer onto the PVDF membrane, the  
85 membrane was incubated with 5  $\mu$ g/ml Proteinase K for 30 min at 37°C (3).

86 **Construction of *Bt*  $\Delta$ CPS Genomic Library** Random genomic expression library of *Bt*  
87  $\Delta$ CPS into *E. coli* MegaX DH10B™ T1R Electrocomp™ Cells (Invitrogen) was  
88 generated by modifying a previously described protocol (4). Briefly, *Bt*  $\Delta$ CPS genomic  
89 DNA was sheared to a size range of ~2000–5,000 bp by sonication, followed by  
90 agarose gel separation and gel purification. Purified DNA was then end-repaired using  
91 the End-It™ DNA End Repair kit (Epicentre) and ligated using a Fast-Link™ DNA

92 Ligation Kit (Epicentre) into pZE21-MCS-1 vector (5), which was linearized at the Hinc II  
93 site using inverse PCR (Table S1). 5 µl of dialyzed ligation reaction was used for  
94 electroporation. Electroporated cells were inoculated into 10 ml of Luria–Bertani (LB)  
95 medium containing 50 µg/ml kanamycin and grown overnight. Overnight cultures were  
96 frozen down with 15% glycerol and stored at –80 °C for subsequent screening.

97 **Colony Dot Blot Analysis** *Bt* ΔCPS genomic expression library was plated onto LB  
98 agar plates containing 50 µg/ml kanamycin and incubated overnight at 37 °C to get ~100  
99 colonies per plate. Colony dot blot assay was performed using a previously published  
100 protocol (6).

101 **SI culture supernatant dialysis** SI culture supernatants harvested from gnotobiotic  
102 mice were added to Amicon Ultra-4 centrifugal filter units with a membrane NMWL of 10  
103 kDa (UFC801024). Filter tubes were centrifuged at 4000 x g for 15 min (Allegra® X-14R  
104 series centrifuge, SX4750 swinging bucket rotor) at 25 °C. Sterile PBS (1x) was used  
105 for buffer exchange and dialysis of the concentrated SI culture supernatant to get rid of  
106 any small molecules, including sodium azide and glucose present in the supernatants.  
107 After 3 buffer exchanges, the SI culture supernatant was re-suspended in 1x PBS  
108 (same as the starting volume) and stored at 4°C for future use.

109 ***In vitro* growth using SI culture supernatant** Bacteroides minimal medium [100 mM  
110 potassium phosphate buffer (pH 7.2), 15 mM NaCl, 4.1 mM cysteine, 7.5mM  
111 (NH<sub>4</sub>)<sub>2</sub>SO<sub>4</sub>, 100 µM MgCl<sub>2</sub>, 1.9 µM hematin, 0.37 nM vitamin B12] supplemented with  
112 glucose, fructose or levan (0.5% w/v), and containing SI culture supernatants harvested  
113 from gnotobiotic mice (30% v/v) was inoculated (1:50) using a freshly grown culture of

114 *Bt* in TYG. Cultures were incubated anaerobically at 37°C and harvested at mid-log  
115 phase for RNA isolation.

116 **IgA depletion** Dialyzed SI culture supernatants harvested from 6 weeks old C57BL/6J  
117 mice were used for IgA depletion. Biotinylated goat anti-mouse IgA (Southern Biotech)  
118 was added at a final concentration of 10µg/ml to supernatants containing IgA. Reaction  
119 tubes were incubated for 30 min at room temperature. Streptavidin RapidSpheres  
120 (EasySep™ Mouse Streptavidin RapidSpheres™ Isolation Kit 19860) were added to the  
121 above reaction tube (100 µl/ml) and incubated for 5 min. IgA was depleted using a  
122 column free EasySep™ Magnet. Isotype ELISA was performed to confirm selective  
123 depletion of IgA.

124 **RNA extraction** Bacterial cultures grown *in vitro*, or an aliquot (~ 50-100 mg) of  
125 feces/cecal contents was suspended in 2 volumes of RNAprotect (Qiagen) and  
126 centrifuged at 3000 x g for 10 min (5424R Eppendorf centrifuge) at room temperature.  
127 500 µl of 2x lysis buffer (200mM NaCl and 20 mM EDTA) was added to the resulting  
128 pellet, together with 210 µl of 20% SDS (Ambion) and 500 µl phenol:chloroform:isoamyl  
129 alcohol (125:24:1; pH 4.5; Ambion). Acid-washed silica beads (0.1mm zirconia-silica  
130 beads 300 mg; BioSpec) were added, and bacteria were lysed using a bead beater (full  
131 power for 2 min in the cold room; Mini-Beadbeater by BioSpec). Following centrifugation  
132 (13000 x g for 3 min at 4°C), the aqueous layer was subjected to another round of  
133 phenol:chloroform:isoamyl alcohol purification, followed by purification with 500 µl of  
134 100% Chloroform. RNA was precipitated by adding 1/10 volume of 3M sodium acetate  
135 (pH 5.2; Ambion) plus 1 volume of ice-cold absolute isopropanol. RNA was purified

136 (RNEasy kit; Qiagen), and residual genomic DNA was removed by DNase treatment  
137 (RNase free DNase; Qiagen). Purified RNA was measured using Nanodrop.

138 **cDNA synthesis** Quality of RNA extracted from both *in vivo* and *in vitro* sources was  
139 confirmed by agarose gel electrophoresis to ensure minimum RNA degradation. cDNA  
140 synthesis was carried out using SuperScript® II Reverse Transcriptase (Invitrogen).

141 cDNA reactions were setup containing RNA (10 µl; 100 ng – 1000 ng), random  
142 hexamers (1 µl; 250 ngµl<sup>-1</sup>) and dNTPs (1 µl; 10mM each). Tubes were incubated at 65°  
143 C for 5 min, and immediately placed on ice. 1st strand buffer (4 µl; 5x), DTT (2 µl; 0.1 M)  
144 and RNase OUT (1 µl; 40 Uml<sup>-1</sup>) were added to these tubes, which were then placed at  
145 25° C for 2 min. SuperScript® II RT was added (1 µl; 200 Uµl<sup>-1</sup>) (or RNase free water in  
146 no-RT control) and the RT reaction was carried out using T100™ Thermal Cycler by  
147 BioRad (25°C for 10min, 42°C for 50 min, 70°C for 15 min). Conversion to cDNA was  
148 confirmed by agarose gel electrophoresis.

149 **Quantitative Real Time PCR (qRT-PCR)** cDNA was first diluted to 5 ngµl<sup>-1</sup> assuming a  
150 direct stoichiometric conversion of known RNA amount into DNA. This was used in a  
151 Brilliant III Ultra-Fast SYBR® Green QPCR reaction (Qiagen) to measure gene  
152 transcript levels (Primes - Table S1). Diluted cDNA (2 µl) was added to a qRT-PCR  
153 reaction containing 2× SYBR Green (10 µl), forward primer (0.5 µl; 20µM), reverse  
154 primer (0.5 µl; 20µM) and Nuclease free water (7 µl). Assays were performed with  
155 specific primers in technical replicates using Bio-Rad CFX96 instrument. At least 3  
156 biological replicates were used for each reaction. Reaction cycle used for the reaction  
157 was: 3 min at 95°C (1x); 5 sec at 95°C followed by 5 sec at 60°C (40x); melt curve.  
158 Relative gene expression was calculated using the  $\Delta\Delta$ CT method with E correction.

159 **Development of High-sensitivity ELISA assay**

160 The study of commensal-specific intestinal IgA has been challenging given that  
161 traditional immunoassays are not very sensitive in detecting it directly in fecal samples.  
162 This may be explained by presence of interfering agents in samples that could inhibit  
163 the assays, and by low concentration of specific IgA in these samples. For our current  
164 study we observed that even in a highly simplified monocolonized setup, presence of  
165 polyclonal IgA in fecal and small intestinal culture supernatants made quantification of  
166 specific IgA against *Bt*'s protein antigens very challenging. To circumvent this issue, we  
167 developed a low cost and high-sensitivity ELISA assay that significantly improved the  
168 detection of antigen-specific IgA present in our samples.

169 The assay is a modification of a traditional horseradish peroxidase (HRP) based ELISA  
170 (7). The initial steps are identical to a classical ELISA, where the surface of a 96-wells  
171 ELISA plate is coated with an antigen of interest that allows capture of antigen-specific  
172 antibodies (here IgA) present in feces or small intestinal culture supernatants.

173 Classically, presence of IgA is then detected by oxidation of a colorimetric substrate  
174 using an anti-IgA conjugated-HRP antibody. We modified this last step using a  
175 previously published *catalyzed reporter deposition* (CARD) method (**Supplementary**  
176 **Figure 3A**) (8). The method relies on the presence of low concentrations of HRP (as  
177 used in signal amplification reactions), which catalyze oxidative condensation of  
178 phenolic compounds such as biotinylated-tyramine that then bind electron-rich moieties  
179 of proteins. This results in the deposition of large amounts of biotinylated-tyramine near  
180 antigen-antibody complexes. Multiple molecules of biotinylated-tyramine can be bound  
181 in this manner, which allows for signal amplification. Every molecule of biotinylated-



182 tyramine can then capture a streptavidin-linked HRP. These HRP molecules are  
183 ultimately used to catalyze the oxidation of the colorimetric substrate 2,2'-azino-bis(3-  
184 ethylbenzthiazoline-6-sulfonic acid) (ABTS). The deposition of additional HRP thus  
185 enables signal amplification and improves the detection limit of the assay.

186 We carried out a number of tests to standardize the conditions of the assay and confirm  
187 that amplification occurs without compromising specificity. As shown in **Supplementary**  
188 **Figure 3B**, for a given concentration of purified IgA, presence of biotinylated-tyramine  
189 amplified the anti-IgA-HRP signal by >2 absorbance units within the linear range. This  
190 amplification resulted in an improved sensitivity and allowed detection of purified IgA  
191 present at a concentration that was 100 times lower than that could be detected without  
192 tyramine amplification (**Supplementary Figure 3C**). To confirm that the amplification is  
193 not at the cost of specificity, we carried out our assay using serial dilutions of culture  
194 supernatants from hybridoma cells secreting *Bt* specific monoclonal IgA (260.8) that  
195 served as a primary antibody (**Supplementary Figure 3D**) (6). Data shows  
196 amplification of signal only in wells coated with *Bt* whole cell lysate, and not when a  
197 non-specific antigen such as *Bacteroides sartorii* that was used for antibody capture.

198 We then tested our assay using feces and small intestinal supernatants (data for feces  
199 shown here) that were generated from germ-free and *Bt* monoclonized mice. As  
200 shown in **Supplementary Figure 3E**, tyramine amplification increased the signal  
201 significantly, and allowed detection of *Bt*-specific IgA response in feces derived from *Bt*  
202 monoclonized mice. Similar to Figure 1 in the main text, we again observed a low-level  
203 reactivity of germ-free fecal IgA against *Bt* antigens. We also used purified, individual *Bt*

204 capsular polysaccharides (cps) to detect capsular antigen-specific IgA in a polyclonal  
205 IgA mixture present in *Bt* monocolonized mice feces (unpublished data).  
206 These results demonstrate the utility of our assay in measuring gut bacteria specific IgA,  
207 when it is present at levels that are below the detection limit offered by traditional  
208 ELISA.

209

### 210 **Supplementary references**

- 211 1. **Sonnenburg JL, Xu J, Leip DD, Chen CH, Westover BP, Weatherford J,**  
212 **Buhler JD, Gordon JI.** 2005. Glycan foraging in vivo by an intestine-adapted  
213 bacterial symbiont. *Science* **307**:1955-1959.
- 214 2. **Peterson DA, McNulty NP, Guruge JL, Gordon JI.** 2007. IgA response to  
215 symbiotic bacteria as a mediator of gut homeostasis. *Cell Host Microbe* **2**:328-  
216 339.
- 217 3. **Macpherson AJ, Gatto D, Sainsbury E, Harriman GR, Hengartner H,**  
218 **Zinkernagel RM.** 2000. A primitive T cell-independent mechanism of intestinal  
219 mucosal IgA responses to commensal bacteria. *Science* **288**:2222-2226.
- 220 4. **Forsberg KJ, Patel S, Gibson MK, Lauber CL, Knight R, Fierer N, Dantas G.**  
221 2014. Bacterial phylogeny structures soil resistomes across habitats. *Nature*  
222 **509**:612-616.
- 223 5. **Lutz R, Bujard H.** 1997. Independent and tight regulation of transcriptional units  
224 in *Escherichia coli* via the LacR/O, the TetR/O and AraC/I1-I2 regulatory  
225 elements. *Nucleic Acids Res* **25**:1203-1210.

- 226 6. **Peterson DA, Planer JD, Guruge JL, Xue L, Downey-Virgin W, Goodman AL,**  
227 **Seedorf H, Gordon JI.** 2015. Characterizing the interactions between a naturally  
228 primed immunoglobulin A and its conserved *Bacteroides thetaiotaomicron*  
229 species-specific epitope in gnotobiotic mice. *J Biol Chem* **290**:12630-12649.
- 230 7. **Engvall E, Perlmann P.** 1971. Enzyme-linked immunosorbent assay (ELISA).  
231 Quantitative assay of immunoglobulin G. *Immunochemistry* **8**:871-874.
- 232 8. **Bobrow MN, Litt GJ, Shaughnessy KJ, Mayer PC, Conlon J.** 1992. The use of  
233 catalyzed reporter deposition as a means of signal amplification in a variety of  
234 formats. *J Immunol Methods* **150**:145-149.

235
