# Supplementary material for: Intestinal IgA Regulates Expression of a Fructan Polysaccharide Utilization Locus in Colonizing Gut Commensal Bacteroides thetaiotaomicron
Source: PubMed Central journal article supplement (PMC6831775; doi:10.1128/mbio.02324-19), 2019-11-05

A

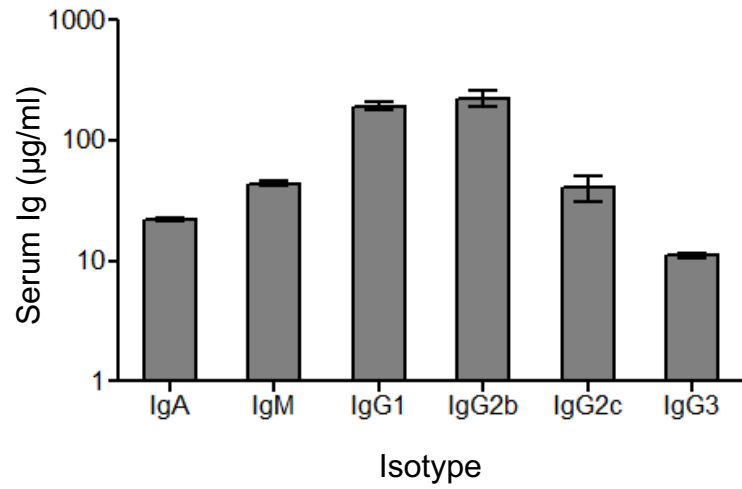

B

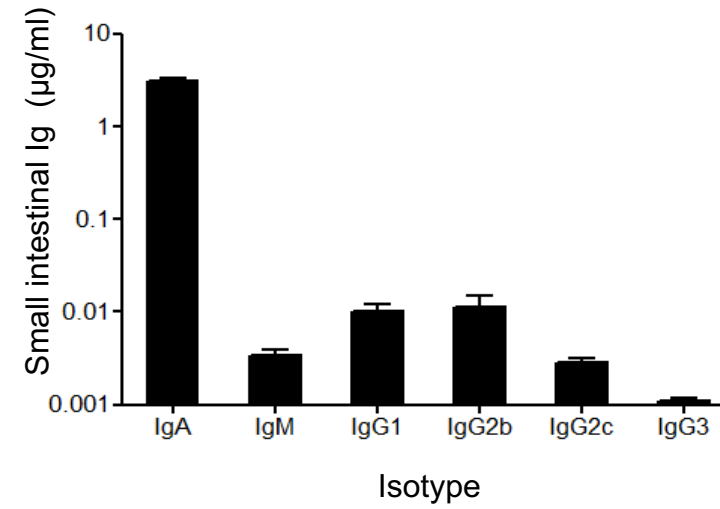

C

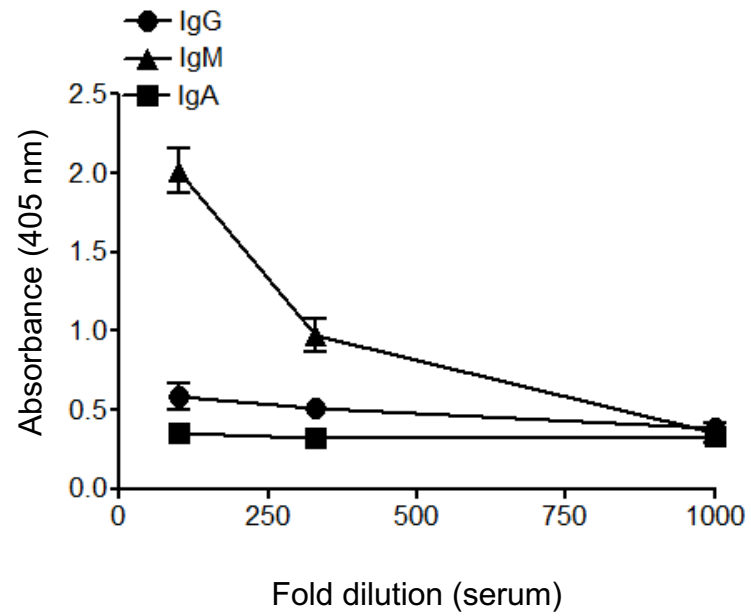

D

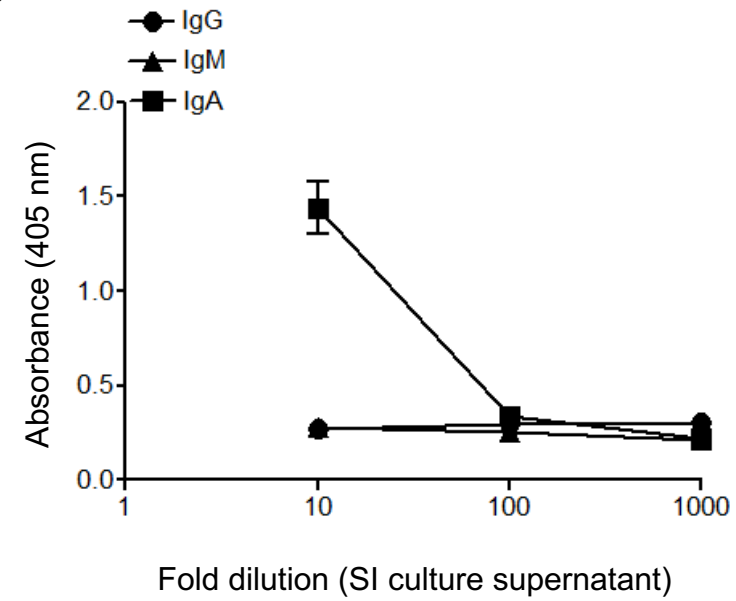

Supplement: mBio.02324-19-sf001.pdf [file mBio.02324-19-sf001.pdf]
