# Supplementary material for: Intestinal IgA Regulates Expression of a Fructan Polysaccharide Utilization Locus in Colonizing Gut Commensal Bacteroides thetaiotaomicron
Source: PubMed Central journal article supplement (PMC6831775; doi:10.1128/mbio.02324-19), 2019-11-05
Supplement: mBio.02324-19-st001.pdf [file mBio.02324-19-st001.pdf]

1 **Supplemental Information (SI)**

2 **Table S1. List of primers used in this study.**

| <b>Primer</b>                                                     | <b>Sequence</b>            |
|-------------------------------------------------------------------|----------------------------|
| <b>pZE-21 MCS-1 linearization</b>                                 |                            |
| pZE linear F                                                      | GACGGTATCGATAAGCTTGAT      |
| pZE linear R                                                      | GACCTCGAGGGGGGG            |
| <b>pZE-21MCS-1<br/>multiple cloning site<br/>(for sequencing)</b> |                            |
| pZE MCS F                                                         | CCCCCCTCGAGGTC             |
| pZE MCS R                                                         | ATCAAGCTTATCGATACCGTC      |
| <b>qPCR primers</b>                                               |                            |
| BT1757 F                                                          | GTCTTTCAAACGCTGCAACA       |
| BT1757 R                                                          | GAGCTTCGGGAACAGACTTG       |
| BT1763 F                                                          | ATGCCTGGTCACCTACGAAC       |
| BT1763 R                                                          | CAAGCGGTCCATTCTCATTT       |
| BT16S F                                                           | GTGTAGCGGTGAAATGCTTAGATATC |
| BT16S R                                                           | CAGTGTCAGTTGCAGTCCAGTGA    |
