# Supplementary material for: Intestinal IgA Regulates Expression of a Fructan Polysaccharide Utilization Locus in Colonizing Gut Commensal Bacteroides thetaiotaomicron
Source: PubMed Central journal article supplement (PMC6831775; doi:10.1128/mbio.02324-19), 2019-11-05
Supplement: mBio.02324-19-st002.pdf [file mBio.02324-19-st002.pdf]

- 1 **Supplemental Information (SI)**
- 2 **Table S2. Genes encoded by the *Bt* ΔCPS genomic library inserts carrying**
- 3 **putative epitopes recognized by polyreactive gut IgA**

| <b>Locus tag(s)<br/>within a genomic<br/>insert</b> | <b>Predicted<br/>molecular<br/>mass (kDa)</b> | <b>Predicted function</b>                                                                                                                                                     | <b>Predicted<br/>protein<br/>localization</b> |
|-----------------------------------------------------|-----------------------------------------------|-------------------------------------------------------------------------------------------------------------------------------------------------------------------------------|-----------------------------------------------|
| BT0189; BT0190                                      | 38; 127                                       | anti-sigma factor; SusC<br>homolog                                                                                                                                            | P; M                                          |
| BT1161; BT1162;<br>BT1163                           | 53; 46; 27                                    | aminopeptidase C;<br>hypothetical; TolC family                                                                                                                                | Ex; M; M                                      |
| BT1212                                              | 51                                            | efflux protein                                                                                                                                                                | M                                             |
| BT1268; BT1269;<br>BT1270                           | 112; 40; 47                                   | AcrB/D/F family transporter;<br>component of multidrug<br>efflux system; putative<br>Na <sup>+</sup> /H <sup>+</sup> antiporter (part of<br>polyamine transport locus<br>(1)) | M; Cy; M                                      |
| BT1286; BT1287;<br>BT1288                           | 65; 24; 52                                    | two-component system<br>response regulator;<br>hypothetical;<br>spermidine/putrescine ABC                                                                                     | M, Ex; M                                      |

|                                    |                   |                                                                                                        |               |
|------------------------------------|-------------------|--------------------------------------------------------------------------------------------------------|---------------|
|                                    |                   | transporter (part of polyamine transport locus (1))                                                    |               |
| BT1385; BT1386;<br>BT1387          | 34; 21; 49        | transcriptional regulator;<br>hypothetical; putative Na <sup>+</sup> -<br>driven multidrug efflux pump | Cy; Cy; M     |
| BT1438; BT1439;<br>BT1440          | 52; 55.46;<br>115 | membrane efflux protein;<br>SusD homolog; SusC<br>homolog                                              | M; M; M       |
| BT1760; BT1761;<br>BT1762          | 59; 50; 64        | Glycoside hydrolase 32;<br>SusE homolog; SusD<br>homolog (2)                                           | M; M; M       |
| BT2437                             | 23                | hypothetical                                                                                           | M             |
| BT3013; BT3014;<br>BT3015          | 73; 33;107        | SusD homolog; chitobiase;<br>hypothetical                                                              | M; M; Unknown |
| BT3152; BT3153;<br>BT3154; BT3155; | 57; 13; 12; 90    | ATP-dependent DNA<br>helicase; hypothetical;<br>hypothetical; Glycosyl<br>hydrolase 65                 | Cy; Cy; M; Ex |
| BT3328; BT3329;<br>BT3330          | 95; 69; 38        | hypothetical; hypothetical;<br>hypothetical                                                            | M; M; M       |
| BT3411; BT3412;<br>BT3413          | 76; 22, 53        | pyrophosphate-energized<br>vacuolar membrane proton                                                    | M; Cy; M      |

|                                   |                |                                                                                                        |                |
|-----------------------------------|----------------|--------------------------------------------------------------------------------------------------------|----------------|
|                                   |                | pump; RNase HII;<br>hypothetical                                                                       |                |
| BT3669; BT3670                    | 21; 117        | Hypothetical; SusC homolog                                                                             | P; M           |
| BT3967; BT3968;<br>BT3969         | 41; 34;161     | putative two-component<br>system sensor; Cation<br>efflux; AcrB/D/F family<br>cation efflux            | M; Ex; M       |
| BT4152; BT4153                    | 113; 48        | beta-galactosidase I;<br>Exopolygalacturonase<br>precursor                                             | Ex; Ex         |
| BT4191; BT4192;<br>BT4193         | 48; 31; 84     | Hypothetical; lipoyl<br>synthase; dipeptidyl-<br>peptidase IV                                          | M; Cy; Ex      |
| BT4675; BT4676;<br>BT4677; BT4678 | 42; 16; 19; 44 | heparin lyase I precursor;<br>putative periplasmic protein;<br>hypothetical; L-serine<br>ammonia-lyase | Ex; Ex; Ex; Cy |

4 M: membrane; Ex: Extracellular; Cy: Cytoplasmic; P: Periplasmic

5

6

7

8

9 **Supplementary references**

- 10 1. **Xu J, Bjursell MK, Himrod J, Deng S, Carmichael LK, Chiang HC, Hooper**  
11 **LV, Gordon JI.** 2003. A genomic view of the human-Bacteroides  
12 thetaiotaomicron symbiosis. *Science* **299**:2074-2076.
- 13 2. **Sonnenburg ED, Zheng H, Joglekar P, Higginbottom SK, Fירbank SJ, Bolam**  
14 **DN, Sonnenburg JL.** 2010. Specificity of polysaccharide use in intestinal  
15 bacteroides species determines diet-induced microbiota alterations. *Cell*  
16 **141**:1241-1252.

17
