# Supplementary material for: Intestinal IgA Regulates Expression of a Fructan Polysaccharide Utilization Locus in Colonizing Gut Commensal Bacteroides thetaiotaomicron
Source: PubMed Central journal article supplement (PMC6831775; doi:10.1128/mbio.02324-19), 2019-11-05
Supplement: mBio.02324-19-st003.pdf [file mBio.02324-19-st003.pdf]

1 **Supplemental Information (SI)**

2 **Table S3. Composition of Teklad Custom Diet (TD.170584) used in the study.**

| <b>Formula</b>                      | <b>g/Kg</b> |
|-------------------------------------|-------------|
| Casein                              | 207.00      |
| DL-Methionine                       | 3.00        |
| Dextrose, anhydrous                 | 325.12      |
| Corn Starch                         | 320.00      |
| Corn Oil                            | 50.00       |
| Cellulose                           | 50.00       |
| Mineral Mix, Ca-P Deficient (79055) | 13.37       |
| Calcium Phosphate, dibasic          | 17.50       |
| Calcium Carbonate                   | 4.00        |
| Vitamin Mix, Teklad (40060)         | 10.00       |
| Ethoxyquin, antioxidant             | 0.01        |

3

4 **Standard Diet:** Labdiet® JL Rat and Mouse/Auto 6F 5K67 (<https://www.labdiet.com/>)
